# Supplementary material for: Pulsed heating atomic layer deposition (PH-ALD) for epitaxial growth of zinc oxide thin films on c-plane sapphire
Source: Royal Society of Chemistry journal article supplement (doi:10.1039/d1dt03581a), 2021-12-06
Supplement: d1dt03581a1.pdf [file d1dt03581a1.pdf]

## **PULSED HEATING ATOMIC LAYER DEPOSITION (PH-ALD) FOR EPITAXIAL GROWTH OF ZINC OXIDE THIN FILMS ON C-PLANE SAPPHIRE**

Brandon D. Piercy,<sup>1</sup> Jamie P. Wooding,<sup>1</sup> Shawn A. Gregory,<sup>1</sup> Mark D. Losego<sup>1</sup>

<sup>1</sup>School of Materials Science and Engineering, Georgia Institute of Technology, Atlanta, GA

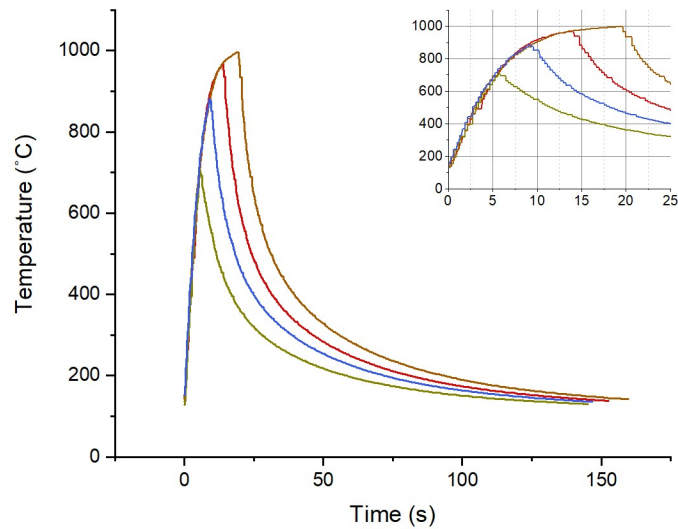

**ESI Figure 1.** *Thermal response of AlN/W heater during the heat pulse and cooling period for pulse durations of 5-20 seconds. (inset) Magnified view of the heat pulse period.*

Characteristic thermal responses for the AlN/W heater with heat pulses of 5-20 seconds are shown in ESI Figure 1. In this configuration, we can reach a temperature of 700°C within 5 seconds and 1000 °C after 20 seconds. The time to return to the ambient chamber temperature of 110°C remains about 3 minutes for all pulse temperatures. The thermal response remains constant over up to 500 cycles within a single run.

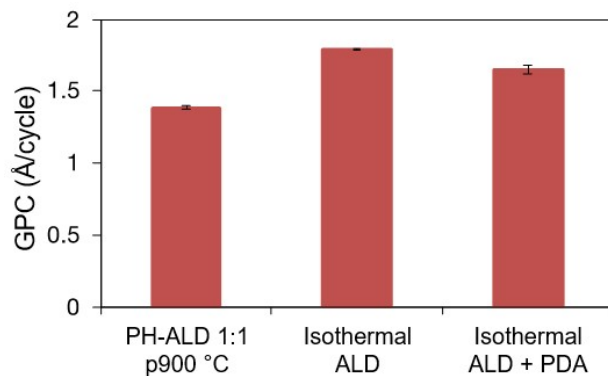

**ESI Figure 2.** Growth rates between ALD, ALD with post-deposition anneal, and a 900 °C, 1:1 PH-ALD sample measured over 500 deposition cycles.

ESI Figure 2 reports the growth per cycle (GPC) for PH-ALD 1:1 p900 °C, isothermal ALD, and isothermal ALD + PDA films. Isothermal ALD films consistently grew at a rate of 0.18 nm/cycle, consistent with literature reports for the ALD of ZnO from DEZ-H<sub>2</sub>O chemistry. PH-ALD 1:1 samples under the most aggressive growth condition of a 900 °C heat pulse every ALD cycle did show a slight reduction in growth rate to 0.14 nm/cycle. This is likely caused by increased densification from the heat pulses, similar to behavior observed in PH-ALD reports in other material systems.<sup>1-2</sup> Regardless, the still relatively high growth rate also indicates that the system is not sensitive to any evaporation of the ZnO surface layers as sometimes reported by other techniques.<sup>3</sup>

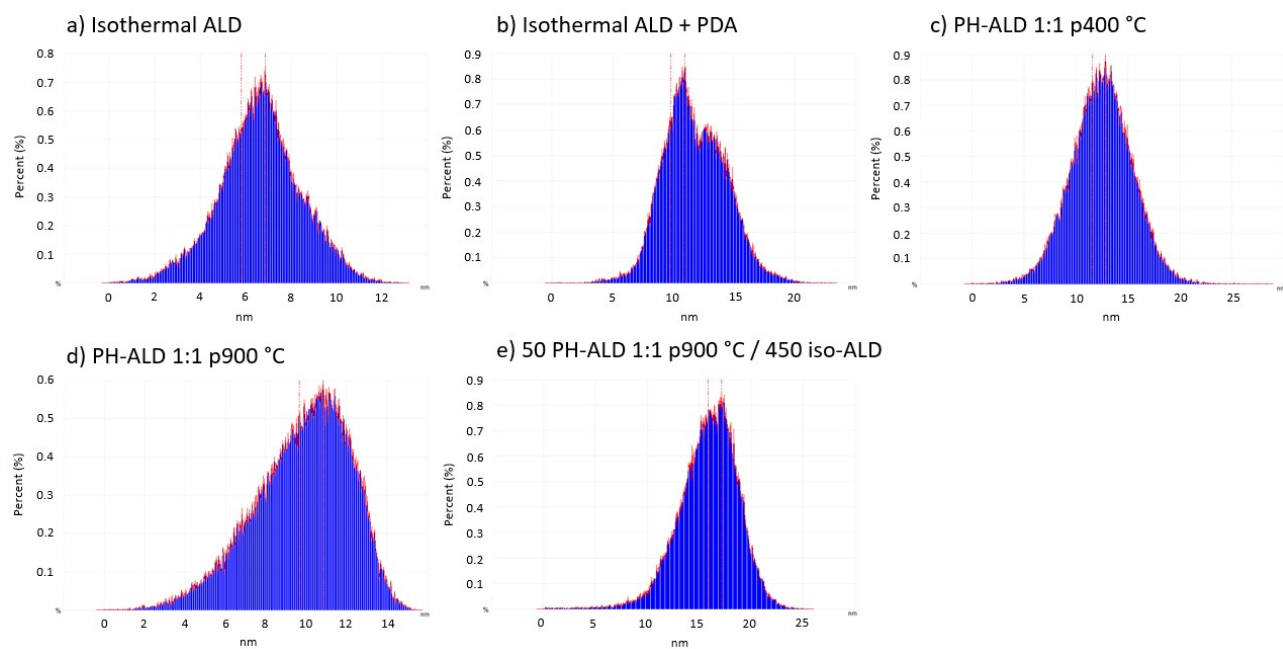

**ESI Figure 3.** Image histogram depth analysis for AFM results for a) isothermal ALD, b) isothermal ALD + PDA, c) PH-ALD 1:1 p 400 °C, e) PH-ALD 1:1 p900 °C, and e) 50 PH-ALD 1:1 p900 °C / 450 isothermal ALD.

ESI Figure 3 presents the image histogram for a representative AFM image for the isothermal ALD films and selected PH-ALD films for reference.

## REFERENCES

1. Conley, J. F.; Ono, Y.; Tweet, D. J., Densification and Improved Electrical Properties of Pulse-Deposited Films Via in Situ Modulated Temperature Annealing. *Applied Physics Letters* **2004**, *84*, 1913-1915.
2. Langston, M. C.; Dasgupta, N. P.; Jung, H. J.; Logar, M.; Huang, Y.; Sinclair, R.; Prinz, F. B., In Situ Cycle-by-Cycle Flash Annealing of Atomic Layer Deposited Materials. *The Journal of Physical Chemistry C* **2012**, *116*, 24177-24183.
3. Ogata, K.; Maejima, K.; Fujita, S.; Fujita, S., Growth Mode Control of ZnO toward Nanorod Structures or High-Quality Layered Structures by Metal-Organic Vapor Phase Epitaxy. *Journal of Crystal Growth* **2003**, *248*, 25-30.
